# Supplementary material for: Score‐based measurement invariance checks for Bayesian maximum‐a‐posteriori estimates in item response theory
Source: PubMed Central journal article supplement (PMC9796736; doi:10.1111/bmsp.12275), 2022-06-06
Supplement: BMSP-75-728-s001.pdf [file BMSP-75-728-s001.pdf]

# Supplementary Material: Application in R

In this supplementary document, we outline the application of both the pooled variance and the simulation-based approach using published R packages. In a first section, we describe some R functions that are necessary for running the tests before showing their application in a second section, where we will reproduce the results of the empirical application in the main text. Throughout this text, we assume that the R packages `mirt` and `strucchange` have been installed and loaded. After their installation, these packages can be loaded via:

```
> library(mirt)
> library(strucchange)
```

## 1 R Functions for Running the Tests

### 1.1 The Pooled Variance Approach

This method can be implemented quite easily by building upon the existing R packages `mirt` and `strucchange`. It is still necessary to define a function that centers the individual score contributions. In `strucchange`, these functions are typically named `estfun`, and we will also use a similar name here to stay consistent. A centering of the score contributions can be achieved via:

```
> estfun_PooledVariance <- function(x){
+   ### Obtain the score contributions from a model estimated by
+   ### the mirt package
+   scores <- mirt::estfun.AllModelClass(x)
+
+   ### Center the score contributions
+   corrector <- apply(scores, 2, mean)
+   scores <- t(apply(scores, 1, function(x) x - corrector))
+
+   return(scores)
+ }
```

### 1.2 The Simulation-based Approach

The simulation-based approach is more difficult to implement. We have to 1) center the score contributions and carry out the group-wise decorrelation, 2)



```

+   newscores[group == a,1:ncol(newscores)] <- subset
+ }
+
+   return(newscores)
+ }

```

We still need a function for the remaining steps of the calculation. A suitable function for the unordered Lagrange Multiplier statistic and a categorical covariate, saved by a factor, is provided by the following function. Please see the main text for a definition of this statistic.

```

> LMuo_p <- function(score, covariate, sims = 1000){
+
+   # Function for calculating the test statistic using
+   # a matrix of individual score contributions and a categorical covariate
+   LMuo <- function(scores = score, covariates = covariate){
+     # A helper matrix that includes the sums of score contributions ordered
+     # for each category of the covariate
+     helper <- matrix(nrow = length(levels(covariates)), ncol = ncol(scores))
+     for (a in levels(covariates)) {
+       helper[which(levels(covariates) == a),] <- apply(scores[covariates == a,]
+       , 2, sum)
+     }
+     # Calculation of the test statistic
+     LMuo <- 0
+     for (a in 1:nrow(helper)) {
+       if (a == 1) {
+         LMuo <- sum(helper[a,]^2)
+       } else {
+         LMuo <- LMuo + sum((helper[a,] - helper[a-1,])^2)
+       }
+     }
+     return(LMuo)
+   }
+
+   # Calculation of the test statistic for the observed process
+   LM_obs <- LMuo()
+
+   # We define a vector to store the reference distribution
+   LMuo_ref <- vector(length = sims)
+
+   # The column-wise mean of scores for calibration
+   mean_scores <- apply(score, 2, mean)
+
+   # Repeat sims times
+   for (a in 1:sims) {
+

```

```

+   # Create a matrix for an artificial stochastic process
+   scores_sims <- matrix(nrow=nrow(score), ncol = ncol(score))
+
+   # For each item parameter, draw from an univariate normal distribution
+   # to mimic a multivariate normal distribution
+   for(b in 1:ncol(scores_sims)){
+     scores_sims[,b] <- rnorm(n = nrow(scores_sims))
+   }
+
+   # Carry out a group-wise decorrelation
+   newscores <- matrix(nrow = nrow(scores_sims), ncol = ncol(scores_sims))
+
+   for (b in levels(covariate)) {
+     subset <- scores_sims[covariate == b,1:ncol(newscores)]
+
+     n <- nrow(subset)
+
+     subset <- subset/sqrt(n)
+     J <- crossprod(subset)
+
+     J12 <- root.matrix(J)
+
+     subset <- t(chol2inv(chol(J12))) %*% t(subset)
+
+     subset <- subset * sqrt(n) ### Leads to unity matrix
+
+     newscores[covariate == b,1:ncol(newscores)] <- subset
+   }
+   scores_sims <- newscores
+
+   # Adapt the mean so that it matches that of the
+   # observed stochastic process
+   for(b in 1:ncol(scores_sims)){
+     scores_sims[,b] <- scores_sims[,b] - mean(scores_sims[,b]) + mean_scores[b]
+   }
+
+   # Calculate the test statistic and store it
+   LMuo_ref[a] <- LMuo(scores = scores_sims, covariates = covariate)
+ }
+
+ # Calculate and return the p-value
+ return(mean(LM_obs < LMuo_ref))
+ }

```

## 2 An Application with Empirical Data

In this section, we demonstrate the application of the functions presented in the first section using the MathExam14W dataset from the `psychotools` package. We start by loading the dataset:

```
> library(psychotools)
> data("MathExam14W")
```

For convenience, we store the responses and the group covariate as separate objects:

```
> resp <- MathExam14W$solved
> group <- MathExam14W$group
```

Next, we want to define our estimation method. We want to compare a) an MML estimator and b) an MAP estimator with flat prior distributions for the slope, intercept and pseudo-guessing parameters. In `mirt`, both can be done by defining suitable models by a special syntax. More information is provided in the documentation of `mirt`. The model for the MML estimator is simply:

```
> model_ML <- 'F = 1-13'
```

In nontechnical terms, this syntax essentially states that items 1-13 are intended to measure a single latent trait. For the MAP estimator, we want to use a  $N(1,10)$  prior for the slope parameters, a  $N(0,10)$  prior for the intercept parameters, and a  $B(1,1)$  prior, which is an uniform distribution, for the pseudo-guessing parameters. This is defined via:

```
> model_MAP <- 'F = 1-13
+ PRIOR = (1-13, g, expbeta, 1, 1),
+ (1-13, a1, norm, 1, 10),
+ (1-13, d, norm, 0, 10)'
```

In our test, we want to check the hypothesis that the item parameters are invariant across both groups. First, we define `constr`, which allows us to constrain all item parameters to be invariant for both groups (for more details, see the documentation of the `mirt` package):

```
> n_params <- ncol(resp)*4
> constr <- c(lapply(seq(1, n_params, 4), function(x) c(x, x + n_params + 2)),
+ lapply(seq(2, n_params, 4), function(x) c(x, x + n_params + 2)),
+ lapply(seq(3, n_params, 4), function(x) c(x, x + n_params + 2)))
```

We are then able to estimate the parameters using both methods and to carry out the tests. The item parameter estimation is done via:

```
> res_ML <- multipleGroup(data=resp, model=model_ML, itemtype='3PL',
+ group = factor(group),
+ invariance = c("free_means", "free_var"),
```

```

+             constrain = constr,
+             TOL = 1e-7, technical = list(NCYCLES = 50000))
> res_MAP <- multipleGroup(data=resp, model=model_MAP, itemtype='3PL',
+             group = factor(group),
+             invariance = c("free_means", "free_var"),
+             constrain = constr,
+             TOL = 1e-7, technical = list(NCYCLES = 50000))

```

This code estimates a multiple group IRT model that assumes a normal distribution of the person parameters in each group, but allows their means and variances to differ in each group. The TOL argument sets the threshold for a convergence of the EM algorithm, which underlies the estimation algorithm, to 1e-7, whereas the NCYCLES arguments sets the maximum number of iterations of the EM algorithm to 50000.

We can now apply the pooled variance approach via:

```

> sctest(res_ML, order.by = group,
+       parm = seq(1, ncol(resp)*3),
+       scores = estfun_PooledVariance, functional = "LMuo")$p.value
> sctest(res_MAP, order.by = group,
+       parm = seq(1, ncol(resp)*3),
+       scores = estfun_PooledVariance, functional = "LMuo")$p.value

```

The simulation-based approach is applied via:

```

> scores_ML <- estfun_groupwise(res_ML)
> scores_MAP <- estfun_groupwise(res_MAP)
> LMuo_p(score = scores_ML, covariate = factor(group))
> LMuo_p(score = scores_MAP, covariate = factor(group))

```

We get p-values close to 0, which indicates a violation of the tested null hypotheses, and thus a violation of parameter invariance.
